# Supplementary material for: Mass Spectrometry-Based Characterization of New Spirolides from Alexandrium ostenfeldii (Dinophyceae)
Source: PubMed Central journal article supplement (PMC7599687; doi:10.3390/md18100505), 2020-10-02
Supplement: marinedrugs-18-00505-s001.pdf [file marinedrugs-18-00505-s001.pdf]

## Supporting Information

### Mass Spectrometry-Based Characterization of New Spirolides from *Alexandrium ostenfeldii* (Dinophyceae)

|                                                                                                            |     |
|------------------------------------------------------------------------------------------------------------|-----|
| <b>Figure S1.</b> HRMS/MS spectrum of compound <b>1</b> (670>164) from AON 24.....                         | S2  |
| <b>Figure S2.</b> HRMS/MS spectrum of compound <b>2</b> (666>164) from NX-56-10.....                       | S3  |
| <b>Figure S3.</b> HRMS/MS spectrum of compound <b>3</b> (696>164) from NX-56-10 .....                      | S3  |
| <b>Figure S4.</b> HRMS/MS spectrum of compound <b>4</b> (678>150) from MX-S-B11.....                       | S4  |
| <b>Figure S5.</b> HRMS/MS spectrum of compound <b>5</b> (694>164) from MX-S-B11.....                       | S4  |
| <b>Figure S6.</b> HRMS/MS spectrum of compound <b>6</b> (708>164) from MX-S-B11.....                       | S5  |
| <b>Figure S7.</b> HRMS/MS spectrum of compound <b>7</b> (720>164) from MX-S-B11.....                       | S6  |
| <b>Figure S8.</b> HRMS/MS spectrum of compound <b>8</b> (722>164) from MX-S-B11.....                       | S6  |
| <b>Figure S9.</b> HRMS/MS spectrum of compound <b>9</b> (738>180) from MX-S-B11.....                       | S7  |
| <b>Figure S10.</b> Proposed fragmentation pattern of <i>m/z</i> 592 from compound <b>1</b> (670>164) ..... | S8  |
| <br>                                                                                                       |     |
| <b>Table S1.</b> Extended fragment list from known spirolides .....                                        | S9  |
| <b>Table S2.</b> Extended HRMS/MS fragment list of compounds <b>1</b> from AON 24 .....                    | S10 |
| <b>Table S3.</b> Extended HRMS/MS fragment list of compounds <b>2</b> and <b>3</b> from NX-56-10.....      | S11 |
| <b>Table S4.</b> Extended HRMS/MS fragment list of compounds <b>4-9</b> from MX-S-B11 .....                | S12 |

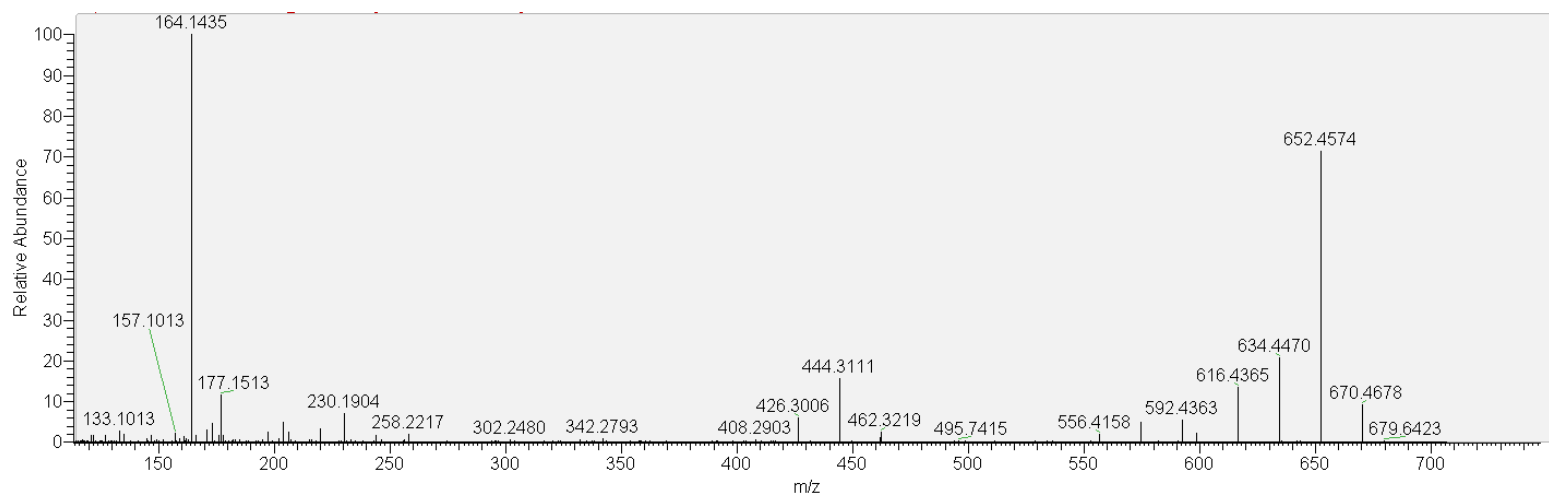

**Figure S1.** HRMS/MS spectrum of compound **1** (670>164) from AON 24.

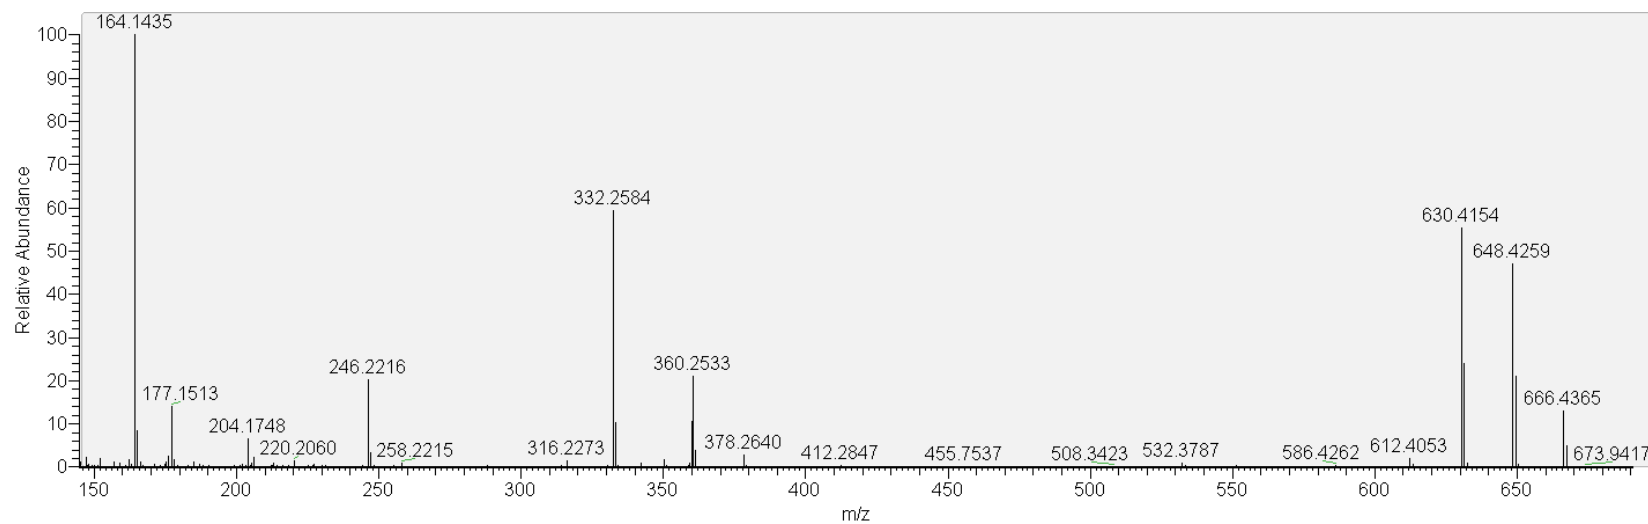

**Figure S2.** HRMS/MS spectrum of compound 2 (666>164) from NX-56-10.

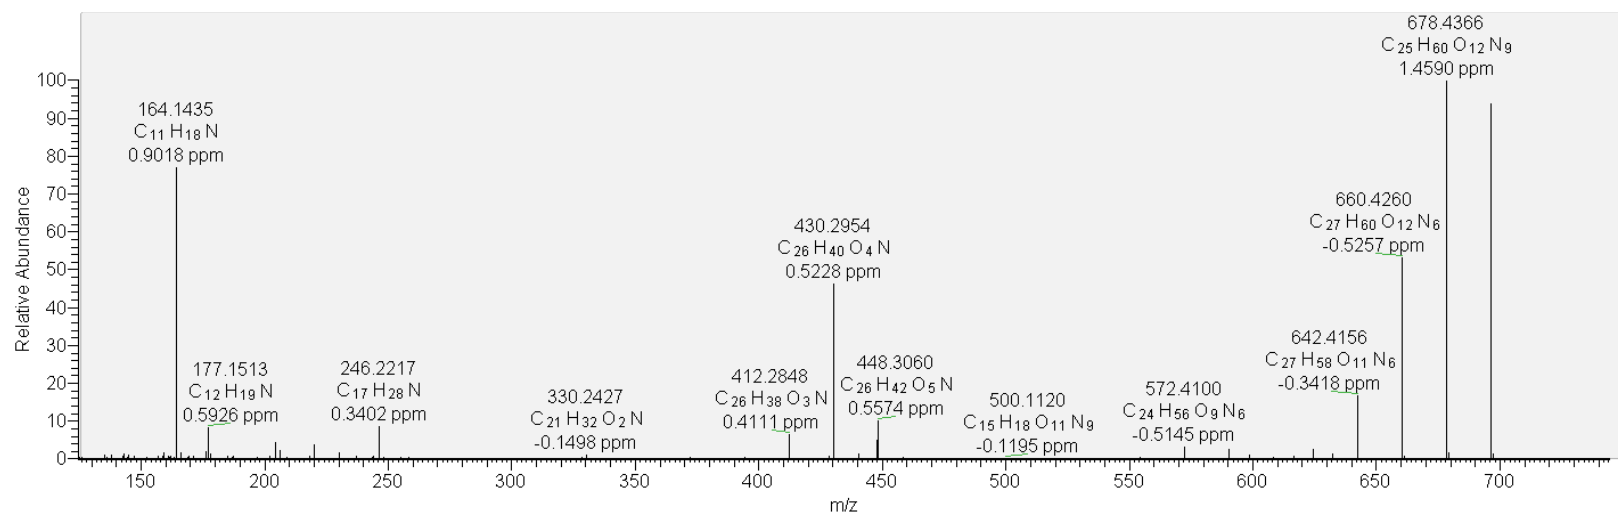

**Figure S3.** HRMS/MS of compound 3 (696>164) from NX-56-10.

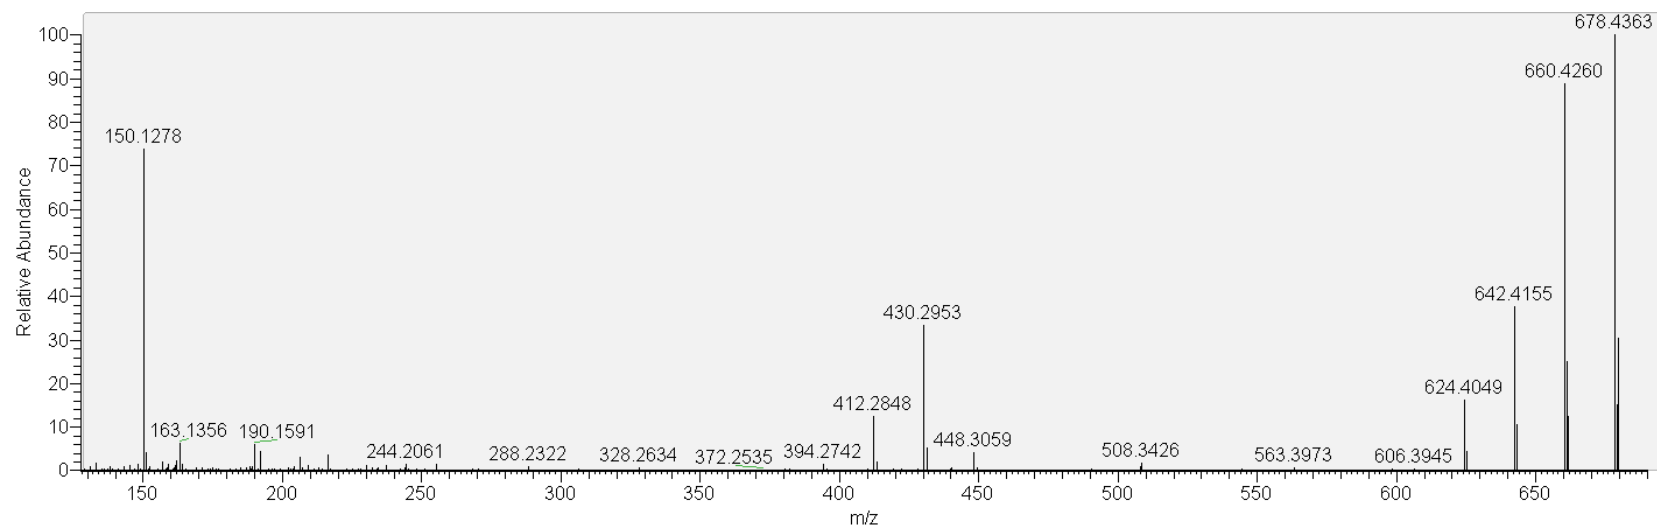

**Figure S4.** HRMS/MS spectrum of compound 4 (678>150) from MX-S-B11.

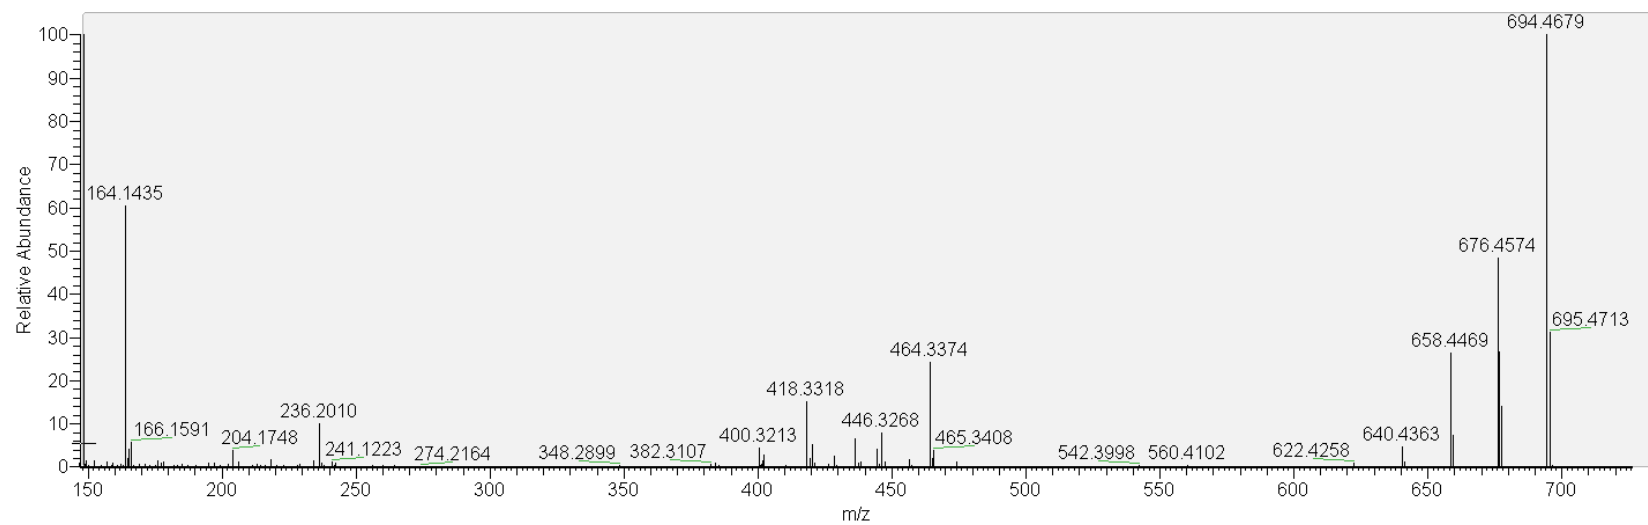

**Figure S5.** HRMS/MS spectrum of compound 5 (694>164) from MX-S-B11.

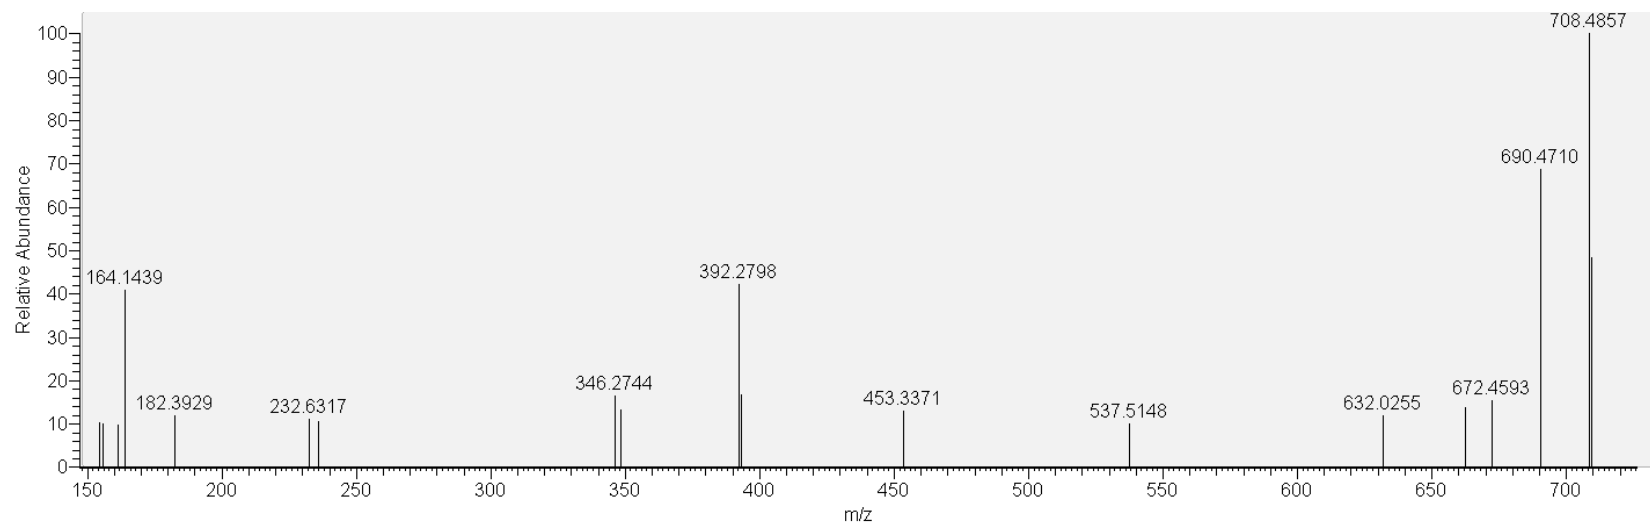

**Figure S6.** HRMS/MS spectrum of compound **6** ( $708 > 164$ ) from MX-S-B11. The 708.4857 peak in the HRMS/MS spectrum displayed an uneven shape. The  $m/z$  690 and 672 peaks are clearly two water losses that do not fit the 708.4857 value with a reasonable ppm error. They, however, do perfectly fit the 708.4836 ion observed in the full scan. Therefore, we argue that the  $m/z$  708.4857 reading in the MSMS scan is created by two unresolved peaks and used the  $m/z$  value from the full scan for the calculation of the elemental formula of the pseudo-molecular ion.

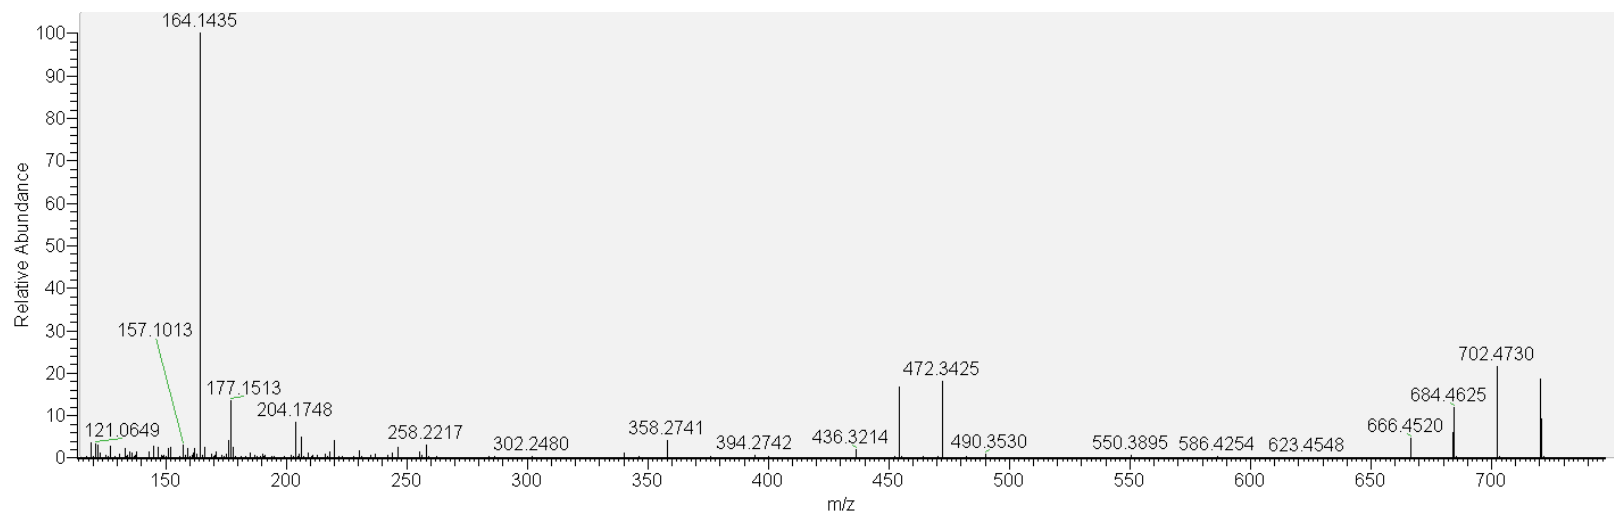

**Figure S7.** HRMS/MS spectrum of compound 7 (720>164) from MX-S-B11.

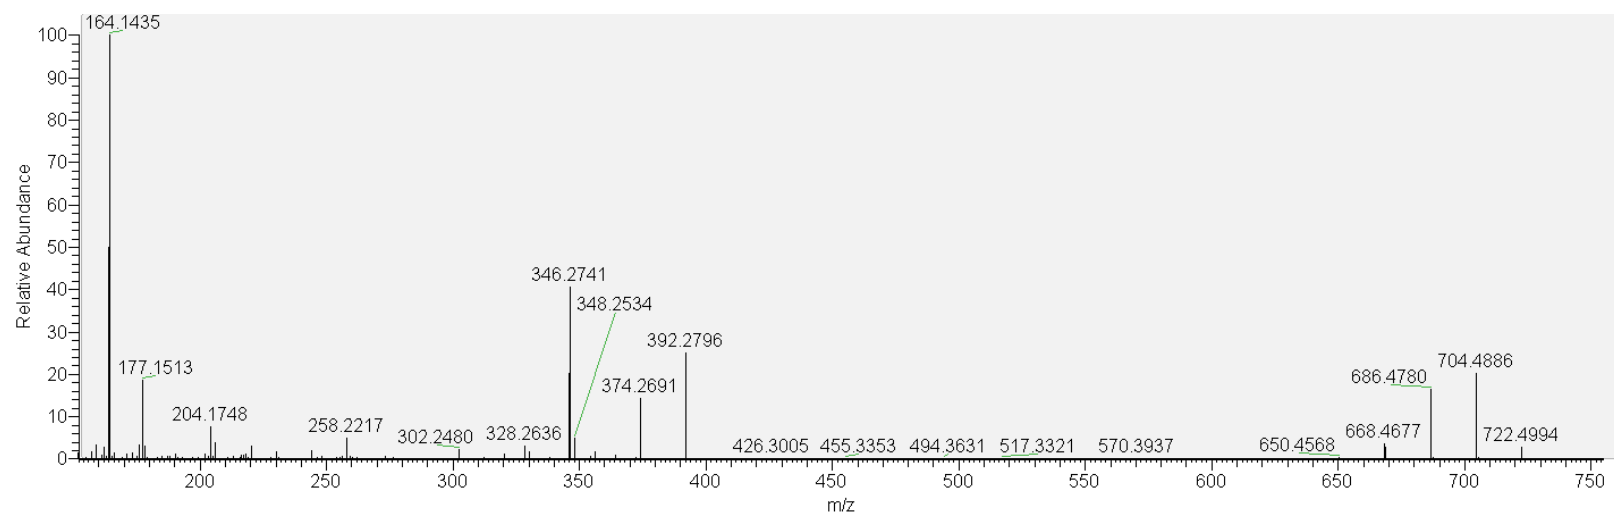

**Figure S8.** HRMS/MS spectrum compound 8 (678>164) from MX-S-B11.

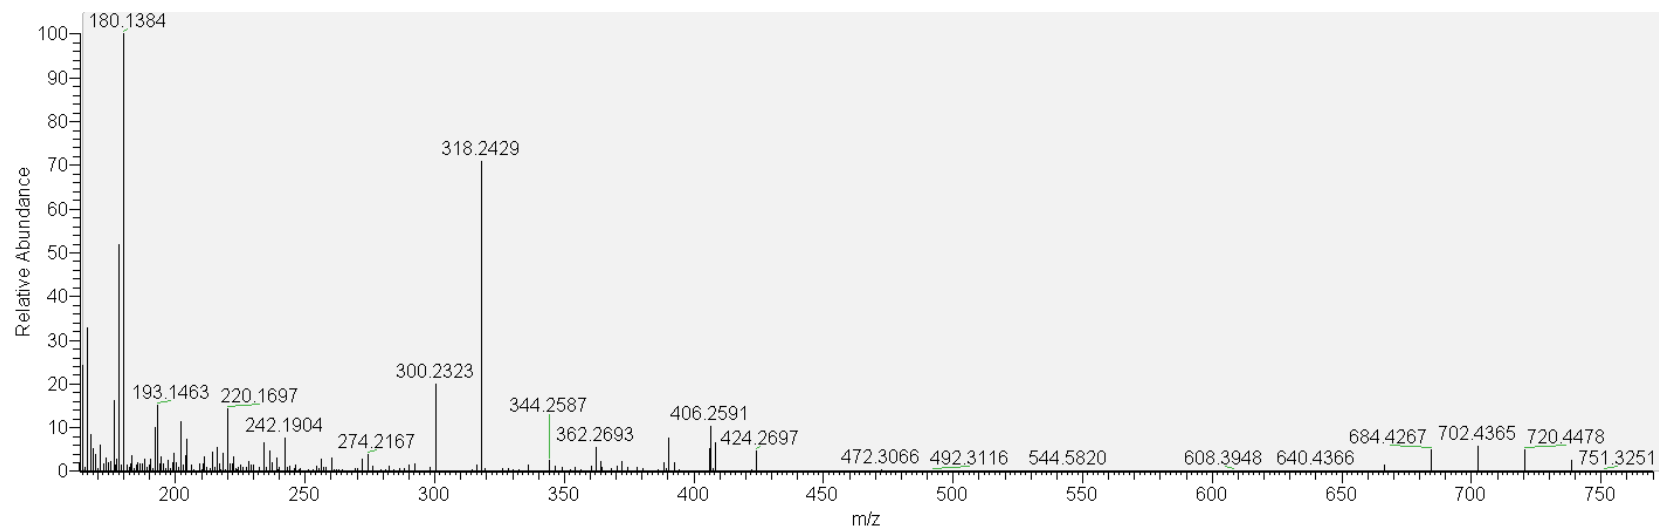

**Figure S9.** HRMS/MS spectrum compound **9** (738>180) from MX-S-B11.

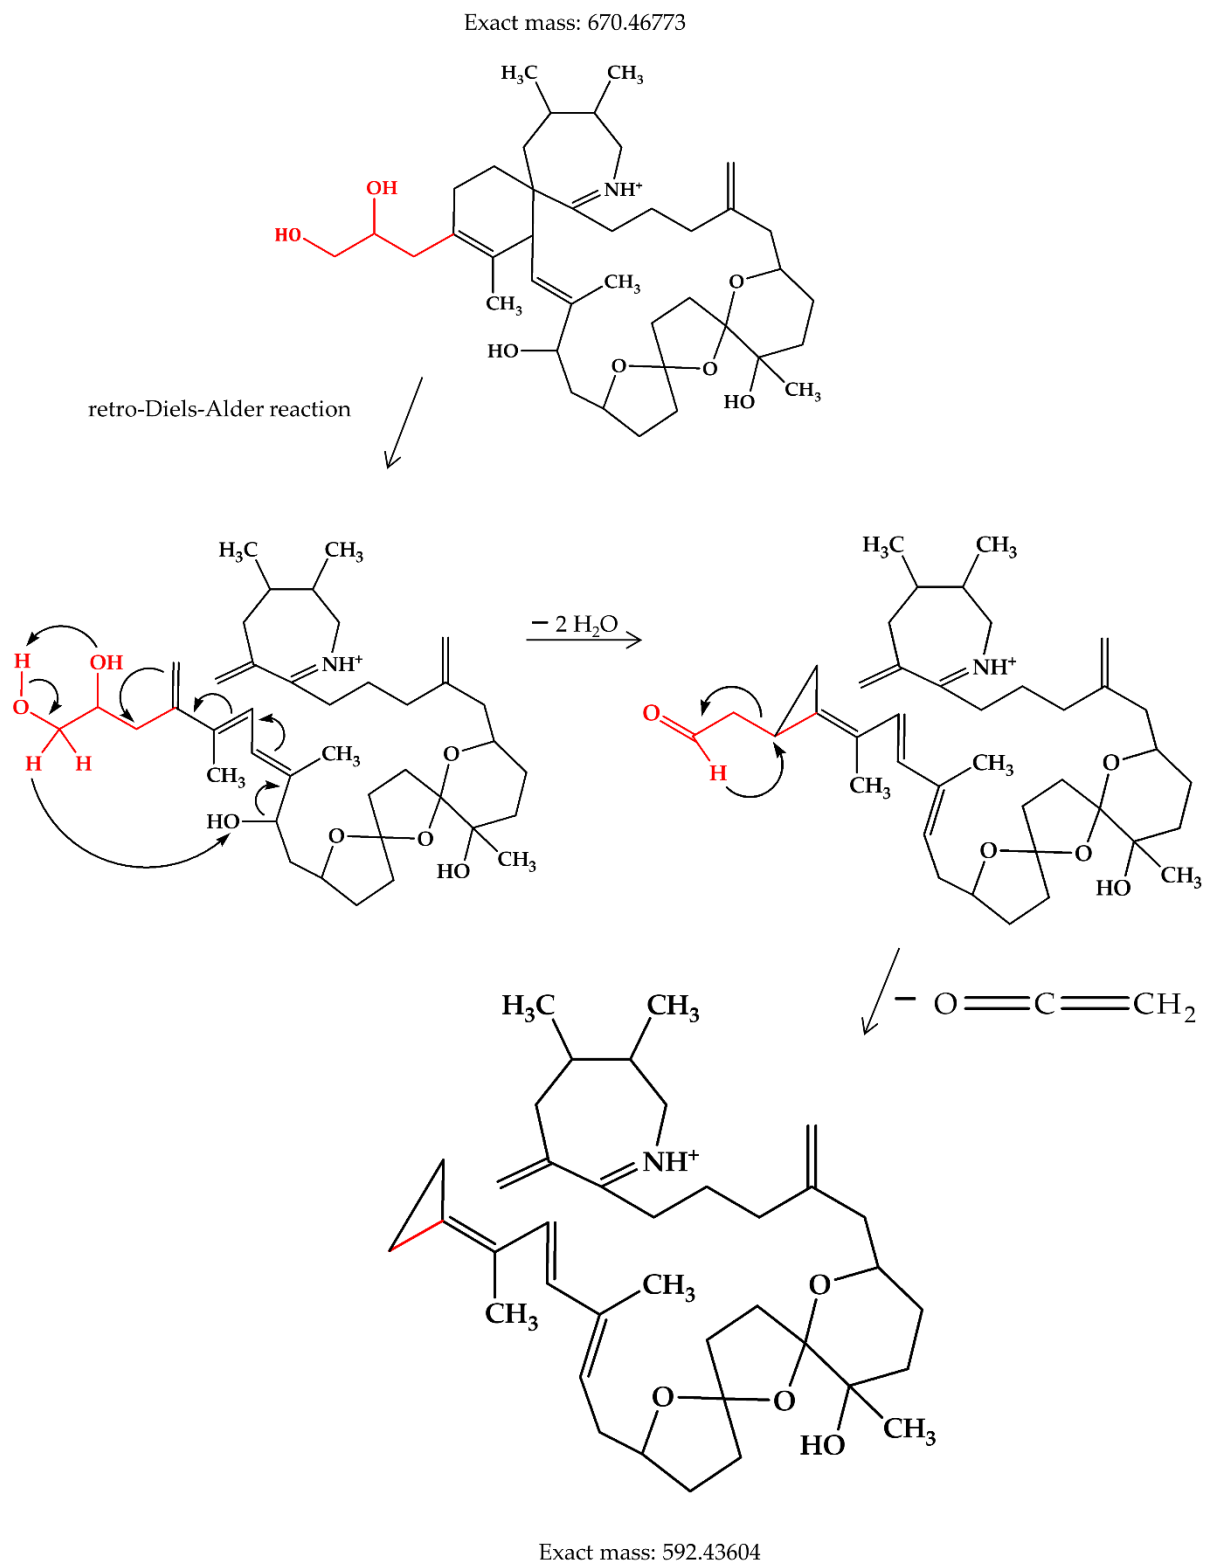

Figure S10. Proposed fragmentation pattern of  $m/z$  592 from compound 1 (670>164).



**Table S1.** Extended fragment list from known spiroolides.

| Spirolide                      | Mass transition<br>( <i>m/z</i> ) | Fragments ( <i>m/z</i> ) |                 |                 |         | Reference |
|--------------------------------|-----------------------------------|--------------------------|-----------------|-----------------|---------|-----------|
|                                |                                   | Group 1                  | Group 2         | Group 3         | Group 4 |           |
| A                              | 692 > 150                         | 692/674/624              | 444/390         | 190             | 150     | [7]       |
| B                              | 694 > 150                         | 694/676/658/640          | 462/444/426     |                 | 150     | [3-4]     |
| C                              | 706 > 164                         | 706/688/638              | 458/404         | 204             | 164     | [7]       |
| 13-desMethyl C                 | 692 > 164                         | 692/674/656/638          | 462/444/426     | 230             | 164     | [7]       |
| 13,19-didesMethyl C            | 678 > 164                         | 678/660/642/624          | 448/430/412/394 |                 | 164     | [9,15]    |
| 20-Hydroxy-13,19-didesMethyl C | 694 > 164                         | 694/676/658/640          | 446/428/410/392 | 292/274/248/230 | 164     | [11]      |
| 27-Hydroxy-13-desMethyl C      | 708 > 180                         | 708/690/672/654/636      | 478/460/442/424 |                 | 180     | [10]      |
| 27-Hydroxy-13,19-didesMethyl C | 694 > 180                         | 694/676/658/640          | 464/446/428/410 |                 | 180     | [10]      |
| 27-Oxo-13,19-didesMethyl C     | 692 > 178                         | 692/674/624              | 444             |                 | 178     | [10]      |
| D                              | 708 > 164                         | 708/690/672/654          | 458/440         | 230/206/204/177 | 164     | [3]       |
| 13-desMethyl D                 | 694 > 164                         | 694/676/658/640          | 444/426         | 230/204/177     | 164     | [8]       |
| 20-Hydroxy-13,19-didesMethyl D | 696 > 164                         | 696/678/660/642          | 446/428/410/392 | 292/274/248/230 | 164     | [11]      |
| G                              | 692 > 164                         | 692/674/656/638          | 378/360/332     | 258             | 164     | [12]      |
| 20-Methyl G                    | 706 > 164                         | 706/688/670/652          | 392/374/346     | 258             | 164     | [12]      |
| H                              | 650 > 164                         | 650/632/614              | 402/384         | 206             | 164     | [13]      |
| I                              | 652 > 164                         | 652/634/616              | 402/384         | 206             | 164     | [13]      |

**Table S2.** Extended HRMS/MS fragment list of compounds **1** from AON 24.

| <b>Compound 1 (670&gt;164)</b> |           |          |                  |                |                                                              |
|--------------------------------|-----------|----------|------------------|----------------|--------------------------------------------------------------|
| <i>m/z</i>                     | Intensity | Relative | Theoretical Mass | $\Delta$ (ppm) | Elemental Composition                                        |
| 670.4678                       | 631       | 9.48     | 670.4677         | 0.04           | C <sub>40</sub> H <sub>64</sub> NO <sub>7</sub> <sup>+</sup> |
| 652.4574                       | 4794      | 72.00    | 652.4572         | 0.23           | C <sub>40</sub> H <sub>62</sub> NO <sub>6</sub> <sup>+</sup> |
| 634.4470                       | 1451      | 21.80    | 634.4466         | 0.36           | C <sub>40</sub> H <sub>60</sub> NO <sub>5</sub> <sup>+</sup> |
| 616.4365                       | 890       | 13.36    | 616.436          | 0.49           | C <sub>40</sub> H <sub>58</sub> NO <sub>4</sub> <sup>+</sup> |
| 592.4363                       | 373       | 5.60     | 592.436          | 0.30           | C <sub>38</sub> H <sub>58</sub> NO <sub>4</sub> <sup>+</sup> |
| 574.4258                       | 344       | 5.16     | 574.4255         | 0.31           | C <sub>38</sub> H <sub>56</sub> NO <sub>3</sub> <sup>+</sup> |
| 462.3219                       | 175       | 2.62     | 462.3214         | 0.47           | C <sub>27</sub> H <sub>44</sub> NO <sub>5</sub> <sup>+</sup> |
| 444.3111                       | 1087      | 16.33    | 444.3108         | 0.29           | C <sub>27</sub> H <sub>42</sub> NO <sub>4</sub> <sup>+</sup> |
| 426.3006                       | 416       | 6.25     | 426.3003         | 0.30           | C <sub>27</sub> H <sub>40</sub> NO <sub>3</sub> <sup>+</sup> |
| 230.1904                       | 477       | 7.17     | 230.1903         | 0.07           | C <sub>16</sub> H <sub>24</sub> N <sup>+</sup>               |
| 177.1513                       | 804       | 12.07    | 177.1512         | 0.06           | C <sub>12</sub> H <sub>19</sub> N <sup>+</sup>               |
| 164.1435                       | 6659      | 100.00   | 164.1434         | 0.13           | C <sub>11</sub> H <sub>18</sub> N <sup>+</sup>               |

**Table S3.** Extended HRMS/MS fragment list of compounds **2** and **3** from NX-56-10.

| <b>Compound 2 (666&gt;164)</b> |           |          |                  |                |                                                              |
|--------------------------------|-----------|----------|------------------|----------------|--------------------------------------------------------------|
| <i>m/z</i>                     | Intensity | Relative | Theoretical Mass | $\Delta$ (ppm) | Elemental Composition                                        |
| 666.4365                       | 4596      | 12.69    | 666.4364         | 0.09           | C <sub>40</sub> H <sub>60</sub> NO <sub>7</sub> <sup>+</sup> |
| 648.4259                       | 17328     | 47.83    | 648.4259         | 0.04           | C <sub>40</sub> H <sub>58</sub> NO <sub>6</sub> <sup>+</sup> |
| 630.4154                       | 20498     | 56.58    | 630.4153         | 0.10           | C <sub>40</sub> H <sub>56</sub> NO <sub>5</sub> <sup>+</sup> |
| 550.3898                       | 25        | /        | 550.3891         | 1.36           | C <sub>35</sub> H <sub>52</sub> NO <sub>4</sub> <sup>+</sup> |
| 532.3787                       | 326       | /        | 532.3785         | 0.38           | C <sub>35</sub> H <sub>50</sub> NO <sub>3</sub> <sup>+</sup> |
| 378.2640                       | 966       | 2.67     | 378.2639         | 0.12           | C <sub>22</sub> H <sub>36</sub> NO <sub>4</sub> <sup>+</sup> |
| 360.2533                       | 7620      | 21.03    | 360.2533         | -0.02          | C <sub>22</sub> H <sub>34</sub> NO <sub>3</sub> <sup>+</sup> |
| 332.2584                       | 21586     | 59.59    | 332.2584         | -0.04          | C <sub>21</sub> H <sub>34</sub> NO <sub>2</sub> <sup>+</sup> |
| 246.2216                       | 7500      | 20.70    | 246.2216         | 0.02           | C <sub>17</sub> H <sub>28</sub> N <sup>+</sup>               |
| 177.1513                       | 4933      | 13.62    | 177.1512         | 0.07           | C <sub>12</sub> H <sub>19</sub> N <sup>+</sup>               |
| 164.1435                       | 36225     | 100.00   | 164.1434         | 0.10           | C <sub>11</sub> H <sub>18</sub> N <sup>+</sup>               |
| <b>Compound 3 (696&gt;164)</b> |           |          |                  |                |                                                              |
| <i>m/z</i>                     | Intensity | Relative | Theoretical Mass | $\Delta$ (ppm) | Elemental Composition                                        |
| 696.4471                       | 18674     | 90.33    | 696.4470         | 0.09           | C <sub>41</sub> H <sub>62</sub> NO <sub>8</sub> <sup>+</sup> |
| 678.4366                       | 20673     | 100.00   | 678.4364         | 0.15           | C <sub>41</sub> H <sub>60</sub> NO <sub>7</sub> <sup>+</sup> |
| 660.426                        | 10407     | 50.34    | 660.4259         | 0.16           | C <sub>41</sub> H <sub>58</sub> NO <sub>6</sub> <sup>+</sup> |
| 642.4156                       | 3308      | 16.00    | 642.4153         | 0.29           | C <sub>41</sub> H <sub>56</sub> NO <sub>5</sub> <sup>+</sup> |
| 624.4048                       | 514       | 2.49     | 624.4047         | 0.05           | C <sub>41</sub> H <sub>54</sub> NO <sub>4</sub> <sup>+</sup> |
| 608.4315                       | 70.3      | /        | 608.43146        | 0.83           | C <sub>38</sub> H <sub>58</sub> NO <sub>5</sub> <sup>+</sup> |
| 590.4208                       | 491       | 2.37     | 590.4204         | 0.45           | C <sub>38</sub> H <sub>56</sub> NO <sub>4</sub> <sup>+</sup> |
| 572.4100                       | 664       | 3.21     | 572.4098         | 0.21           | C <sub>38</sub> H <sub>54</sub> NO <sub>3</sub> <sup>+</sup> |
| 554.3998                       | 127       | 0.62     | 554.3993         | 0.52           | C <sub>38</sub> H <sub>52</sub> NO <sub>2</sub> <sup>+</sup> |
| 500.1120                       | 40        | 0.19     | 500.1129         | -0.89          | C <sub>31</sub> H <sub>18</sub> NO <sub>6</sub> <sup>+</sup> |
| 448.3060                       | 1961      | 9.49     | 448.3057         | 0.25           | C <sub>26</sub> H <sub>42</sub> NO <sub>5</sub> <sup>+</sup> |
| 432.3114                       | 43        | 0.21     | 432.3108         | 0.60           | C <sub>26</sub> H <sub>42</sub> NO <sub>4</sub> <sup>+</sup> |
| 430.2954                       | 9046      | 43.76    | 430.2952         | 0.22           | C <sub>26</sub> H <sub>40</sub> NO <sub>4</sub> <sup>+</sup> |
| 412.2848                       | 1342      | 6.49     | 412.2846         | 0.17           | C <sub>26</sub> H <sub>38</sub> NO <sub>3</sub> <sup>+</sup> |
| 394.2742                       | 69        | 0.34     | 394.2741         | 0.18           | C <sub>26</sub> H <sub>36</sub> NO <sub>2</sub> <sup>+</sup> |
| 248.2009                       | 63        | 0.31     | 248.2009         | 0.05           | C <sub>16</sub> H <sub>26</sub> NO <sup>+</sup>              |
| 246.2217                       | 1776      | 8.59     | 246.2216         | 0.08           | C <sub>17</sub> H <sub>28</sub> N <sup>+</sup>               |
| 177.1513                       | 1612      | 7.80     | 177.1512         | 0.10           | C <sub>12</sub> H <sub>19</sub> N <sup>+</sup>               |
| 164.1435                       | 15352     | 74.26    | 164.1434         | 0.15           | C <sub>11</sub> H <sub>18</sub> N <sup>+</sup>               |

**Table S4.** Extended HRMS/MS fragment list of compounds **4-9** from MX-S-B11.

| <b>Compound 4 (678&gt;150)</b> |           |          |                  |                |                                                  |
|--------------------------------|-----------|----------|------------------|----------------|--------------------------------------------------|
| <i>m/z</i>                     | Intensity | Relative | Theoretical Mass | $\Delta$ (ppm) | Elemental Composition                            |
| 678.4363                       | 107716    | 100.00   | 678.4364         | -0.15          | C <sub>41</sub> H <sub>60</sub> NO <sup>7+</sup> |
| 660.4260                       | 93076     | 86.41    | 660.4259         | 0.10           | C <sub>41</sub> H <sub>58</sub> NO <sup>6+</sup> |
| 642.4155                       | 39210     | 36.40    | 642.4153         | 0.17           | C <sub>41</sub> H <sub>56</sub> NO <sup>5+</sup> |
| 624.4049                       | 17080     | 15.86    | 624.4047         | 0.17           | C <sub>41</sub> H <sub>54</sub> NO <sup>4+</sup> |
| 508.3426                       | 1867      | 1.73     | 508.3421         | 0.45           | C <sub>32</sub> H <sub>46</sub> NO <sup>4+</sup> |
| 490.3318                       | 576       | 0.53     | 490.3316         | 0.25           | C <sub>32</sub> H <sub>44</sub> NO <sup>3+</sup> |
| 448.3059                       | 4390      | 4.08     | 448.3057         | 0.19           | C <sub>26</sub> H <sub>42</sub> NO <sup>5+</sup> |
| 430.2953                       | 35422     | 32.88    | 430.2952         | 0.16           | C <sub>26</sub> H <sub>40</sub> NO <sup>4+</sup> |
| 412.2848                       | 13180     | 12.24    | 412.2846         | 0.14           | C <sub>26</sub> H <sub>38</sub> NO <sup>3+</sup> |
| 394.2742                       | 1535      | 1.43     | 394.2741         | 0.14           | C <sub>26</sub> H <sub>36</sub> NO <sup>2+</sup> |
| 380.2584                       | 467       | 0.43     | 380.2584         | -0.01          | C <sub>25</sub> H <sub>34</sub> NO <sup>2+</sup> |
| 244.2061                       | 1573      | 1.46     | 244.2060         | 0.08           | C <sub>17</sub> H <sub>26</sub> N <sup>+</sup>   |
| 230.1904                       | 1180      | 1.10     | 230.1903         | 0.09           | C <sub>16</sub> H <sub>24</sub> N <sup>+</sup>   |
| 216.1747                       | 3648      | 3.39     | 216.1747         | 0.07           | C <sub>15</sub> H <sub>22</sub> N <sup>+</sup>   |
| 206.1904                       | 3209      | 2.98     | 206.1903         | 0.09           | C <sub>14</sub> H <sub>24</sub> N <sup>+</sup>   |
| 192.1748                       | 4859      | 4.51     | 192.1747         | 0.11           | C <sub>13</sub> H <sub>22</sub> N <sup>+</sup>   |
| 190.1591                       | 6194      | 5.75     | 190.1590         | 0.06           | C <sub>13</sub> H <sub>20</sub> N <sup>+</sup>   |
| 150.1278                       | 77982     | 72.40    | 150.1277         | 0.10           | C <sub>10</sub> H <sub>16</sub> N <sup>+</sup>   |
| <b>Compound 5 (694&gt;164)</b> |           |          |                  |                |                                                  |
| <i>m/z</i>                     | Intensity | Relative | Theoretical Mass | $\Delta$ (ppm) | Elemental Composition                            |
| 694.4679                       | 439976    | 100.00   | 694.4677         | 0.24           | C <sub>42</sub> H <sub>64</sub> NO <sup>7+</sup> |
| 676.4574                       | 215774    | 49.04    | 676.4572         | 0.34           | C <sub>42</sub> H <sub>62</sub> NO <sup>6+</sup> |
| 658.4469                       | 113275    | 25.75    | 658.4466         | 0.45           | C <sub>42</sub> H <sub>60</sub> NO <sup>5+</sup> |
| 640.4363                       | 20366     | 4.63     | 640.436          | 0.48           | C <sub>42</sub> H <sub>58</sub> NO <sup>4+</sup> |
| 622.4258                       | 3963      | 0.90     | 622.4255         | 0.60           | C <sub>42</sub> H <sub>56</sub> NO <sup>3+</sup> |
| 614.4571                       | 1110      | 0.25     | 614.4568         | 0.52           | C <sub>41</sub> H <sub>60</sub> NO <sup>3+</sup> |
| 560.4102                       | 1784      | 0.41     | 560.4098         | 0.71           | C <sub>37</sub> H <sub>54</sub> NO <sup>3+</sup> |
| 474.3581                       | 5138      | 1.17     | 474.3578         | 0.65           | C <sub>29</sub> H <sub>48</sub> NO <sup>4+</sup> |
| 464.3374                       | 107168    | 24.36    | 464.337          | 0.76           | C <sub>27</sub> H <sub>46</sub> NO <sup>5+</sup> |
| 456.3476                       | 7674      | 1.74     | 456.3472         | 0.82           | C <sub>29</sub> H <sub>46</sub> NO <sup>3+</sup> |
| 446.3268                       | 33845     | 7.69     | 446.3265         | 0.73           | C <sub>27</sub> H <sub>44</sub> NO <sup>4+</sup> |
| 444.3476                       | 18160     | 4.13     | 444.3472         | 0.77           | C <sub>28</sub> H <sub>46</sub> NO <sup>3+</sup> |
| 436.3425                       | 28540     | 6.49     | 436.3421         | 0.76           | C <sub>26</sub> H <sub>46</sub> NO <sup>4+</sup> |
| 428.3163                       | 10930     | 2.48     | 428.3159         | 0.85           | C <sub>27</sub> H <sub>42</sub> NO <sup>3+</sup> |
| 420.3111                       | 22489     | 5.11     | 420.3108         | 0.55           | C <sub>25</sub> H <sub>42</sub> NO <sup>4+</sup> |
| 418.3318                       | 64135     | 14.58    | 418.3316         | 0.59           | C <sub>26</sub> H <sub>44</sub> NO <sup>3+</sup> |
| 410.3057                       | 1978      | 0.45     | 410.3054         | 0.83           | C <sub>27</sub> H <sub>40</sub> NO <sup>2+</sup> |

|                                |           |          |                  |                |                                                              |
|--------------------------------|-----------|----------|------------------|----------------|--------------------------------------------------------------|
| 402.3006                       | 12085     | 2.75     | 402.3003         | 0.74           | C <sub>25</sub> H <sub>40</sub> NO <sub>3</sub> <sup>+</sup> |
| 400.3213                       | 19423     | 4.41     | 400.321          | 0.63           | C <sub>26</sub> H <sub>42</sub> NO <sub>2</sub> <sup>+</sup> |
| 382.3107                       | 3077      | 0.70     | 382.3104         | 0.75           | C <sub>26</sub> H <sub>40</sub> NO <sup>+</sup>              |
| 236.2010                       | 44657     | 10.15    | 236.2009         | 0.35           | C <sub>15</sub> H <sub>26</sub> NO <sup>+</sup>              |
| 204.1748                       | 16971     | 3.86     | 204.1747         | 0.78           | C <sub>14</sub> H <sub>22</sub> N <sup>+</sup>               |
| 177.1513                       | 4197      | 0.95     | 177.1512         | 0.76           | C <sub>12</sub> H <sub>19</sub> N <sup>+</sup>               |
| 164.1435                       | 269143    | 61.17    | 164.1434         | 0.90           | C <sub>11</sub> H <sub>18</sub> N <sup>+</sup>               |
| <b>Compound 6 (708&gt;164)</b> |           |          |                  |                |                                                              |
| <i>m/z</i>                     | Intensity | Relative | Theoretical Mass | $\Delta$ (ppm) | Elemental Composition                                        |
| 708.4857                       | 119695    | 100.00   | 708.4834         | 1.06           | C <sub>43</sub> H <sub>66</sub> NO <sub>7</sub> <sup>+</sup> |
| 690.4710                       | 82644     | 69.05    | 690.4728         | -2.62          | C <sub>43</sub> H <sub>64</sub> NO <sub>6</sub> <sup>+</sup> |
| 672.4593                       | 18347     | 15.33    | 672.4623         | -2.96          | C <sub>43</sub> H <sub>63</sub> NO <sub>5</sub> <sup>+</sup> |
| 392.2798                       | 49950     | 41.73    | 392.2795         | 0.56           | C <sub>23</sub> H <sub>38</sub> NO <sub>4</sub> <sup>+</sup> |
| 346.2744                       | 18766     | 15.68    | 346.2741         | 0.86           | C <sub>22</sub> H <sub>36</sub> NO <sub>2</sub> <sup>+</sup> |
| 164.1439                       | 47095     | 39.35    | 164.1434         | 3.30           | C <sub>11</sub> H <sub>18</sub> N <sup>+</sup>               |
| <b>Compound 7 (720&gt;164)</b> |           |          |                  |                |                                                              |
| <i>m/z</i>                     | Intensity | Relative | Theoretical Mass | $\Delta$ (ppm) | Elemental Composition                                        |
| 720.4836                       | 838216    | 18.34    | 720.4834         | 0.36           | C <sub>44</sub> H <sub>66</sub> NO <sub>7</sub> <sup>+</sup> |
| 702.4730                       | 1006502   | 22.02    | 702.4728         | 0.30           | C <sub>44</sub> H <sub>64</sub> NO <sub>6</sub> <sup>+</sup> |
| 684.4625                       | 524711    | 11.48    | 684.4623         | 0.31           | C <sub>44</sub> H <sub>62</sub> NO <sub>5</sub> <sup>+</sup> |
| 666.4520                       | 219421    | 4.80     | 666.4517         | 0.42           | C <sub>44</sub> H <sub>60</sub> NO <sub>4</sub> <sup>+</sup> |
| 586.4254                       | 16660     | 0.36     | 586.4255         | -0.20          | C <sub>39</sub> H <sub>56</sub> NO <sub>3</sub> <sup>+</sup> |
| 490.3530                       | 43167     | 0.94     | 490.3527         | 0.61           | C <sub>29</sub> H <sub>48</sub> NO <sub>5</sub> <sup>+</sup> |
| 472.3425                       | 809589    | 17.71    | 472.3421         | 0.70           | C <sub>29</sub> H <sub>46</sub> NO <sub>4</sub> <sup>+</sup> |
| 454.3318                       | 778851    | 17.04    | 454.3316         | 0.61           | C <sub>29</sub> H <sub>44</sub> NO <sub>3</sub> <sup>+</sup> |
| 436.3214                       | 91264     | 2.00     | 436.3210         | 0.86           | C <sub>29</sub> H <sub>42</sub> NO <sub>2</sub> <sup>+</sup> |
| 376.2849                       | 14601     | 0.32     | 376.2846         | 0.77           | C <sub>23</sub> H <sub>38</sub> NO <sub>3</sub> <sup>+</sup> |
| 358.2741                       | 181103    | 3.96     | 358.2741         | 0.15           | C <sub>23</sub> H <sub>36</sub> NO <sub>2</sub> <sup>+</sup> |
| 346.2743                       | 14120     | 0.31     | 346.2741         | 0.59           | C <sub>22</sub> H <sub>36</sub> NO <sub>2</sub> <sup>+</sup> |
| 340.2637                       | 47557     | 1.04     | 340.2635         | 0.71           | C <sub>23</sub> H <sub>34</sub> NO <sup>+</sup>              |
| 302.2480                       | 17381     | 0.38     | 302.2478         | 0.58           | C <sub>20</sub> H <sub>32</sub> NO <sup>+</sup>              |
| 246.2217                       | 115447    | 2.53     | 246.2216         | 0.22           | C <sub>17</sub> H <sub>28</sub> N <sup>+</sup>               |
| 230.1905                       | 76776     | 1.68     | 230.1903         | 0.58           | C <sub>16</sub> H <sub>24</sub> N <sup>+</sup>               |
| 177.1513                       | 623947    | 13.65    | 177.1512         | 0.59           | C <sub>12</sub> H <sub>19</sub> N <sup>+</sup>               |
| 164.1435                       | 4570111   | 100.00   | 164.1434         | 0.72           | C <sub>11</sub> H <sub>18</sub> N <sup>+</sup>               |
| <b>Compound 8 (722&gt;164)</b> |           |          |                  |                |                                                              |
| <i>m/z</i>                     | Intensity | Relative | Theoretical Mass | $\Delta$ (ppm) | Elemental Composition                                        |
| 722.4994                       | 3498      | 2.98     | 722.4990         | 0.50           | C <sub>44</sub> H <sub>68</sub> NO <sub>7</sub> <sup>+</sup> |
| 704.4886                       | 24066     | 20.48    | 704.4885         | 0.26           | C <sub>44</sub> H <sub>66</sub> NO <sub>6</sub> <sup>+</sup> |
| 686.4780                       | 20248     | 17.23    | 686.4779         | 0.18           | C <sub>44</sub> H <sub>64</sub> NO <sub>5</sub> <sup>+</sup> |

| 686.4420                       | 1734      | 1.48     | 686.4415         | 0.73    | C <sub>43</sub> H <sub>60</sub> NO <sub>6</sub> <sup>+</sup> |
|--------------------------------|-----------|----------|------------------|---------|--------------------------------------------------------------|
| 668.4677                       | 4385      | 3.73     | 668.4673         | 0.56    | C <sub>44</sub> H <sub>62</sub> NO <sub>4</sub> <sup>+</sup> |
| 668.4315                       | 1014      | 0.86     | 668.4310         | 0.76    | C <sub>43</sub> H <sub>58</sub> NO <sub>5</sub> <sup>+</sup> |
| 650.4568                       | 371       | 0.32     | 650.4568         | 0.12    | C <sub>44</sub> H <sub>60</sub> NO <sub>3</sub> <sup>+</sup> |
| 392.2796                       | 31295     | 26.63    | 392.2795         | 0.17    | C <sub>23</sub> H <sub>38</sub> NO <sub>4</sub> <sup>+</sup> |
| 374.2691                       | 16917     | 14.39    | 374.2690         | 0.28    | C <sub>23</sub> H <sub>36</sub> NO <sub>3</sub> <sup>+</sup> |
| 372.2897                       | 660       | 0.56     | 372.2897         | -0.09   | C <sub>24</sub> H <sub>38</sub> NO <sub>2</sub> <sup>+</sup> |
| 364.2846                       | 1170      | 1.00     | 364.2846         | -0.12   | C <sub>22</sub> H <sub>38</sub> NO <sub>3</sub> <sup>+</sup> |
| 356.2585                       | 2172      | 1.85     | 356.2584         | 0.22    | C <sub>23</sub> H <sub>34</sub> NO <sub>2</sub> <sup>+</sup> |
| 354.2794                       | 701       | 0.60     | 354.2791         | 0.87    | C <sub>24</sub> H <sub>36</sub> NO <sup>+</sup>              |
| 348.2534                       | 5914      | 5.03     | 348.2533         | 0.37    | C <sub>21</sub> H <sub>34</sub> NO <sub>3</sub> <sup>+</sup> |
| 346.2741                       | 47722     | 40.60    | 346.2741         | 0.24    | C <sub>22</sub> H <sub>36</sub> NO <sub>2</sub> <sup>+</sup> |
| 302.2480                       | 2632      | 2.24     | 302.2478         | 0.48    | C <sub>20</sub> H <sub>32</sub> NO <sup>+</sup>              |
| 258.2217                       | 6122      | 5.21     | 258.2216         | 0.32    | C <sub>18</sub> H <sub>28</sub> N <sup>+</sup>               |
| 230.1904                       | 2108      | 1.79     | 230.1903         | 0.45    | C <sub>16</sub> H <sub>24</sub> N <sup>+</sup>               |
| 177.1513                       | 22196     | 18.89    | 177.1512         | 0.51    | C <sub>12</sub> H <sub>19</sub> N <sup>+</sup>               |
| 164.1435                       | 117532    | 100.00   | 164.1434         | 0.72    | C <sub>11</sub> H <sub>18</sub> N <sup>+</sup>               |
| <b>Compound 9 (738&gt;180)</b> |           |          |                  |         |                                                              |
| <i>m/z</i>                     | Intensity | Relative | Theoretical Mass | Δ (ppm) | Elemental Composition                                        |
| 738.4579                       | 5015      | 2.43     | 738.4576         | 0.44    | C <sub>43</sub> H <sub>64</sub> NO <sub>9</sub> <sup>+</sup> |
| 720.4478                       | 10345     | 5.01     | 720.4470         | 1.14    | C <sub>43</sub> H <sub>62</sub> NO <sub>8</sub> <sup>+</sup> |
| 702.4365                       | 12580     | 6.09     | 702.4364         | 0.13    | C <sub>43</sub> H <sub>60</sub> NO <sub>7</sub> <sup>+</sup> |
| 684.4267                       | 10002     | 4.85     | 684.4259         | 1.22    | C <sub>43</sub> H <sub>58</sub> NO <sub>6</sub> <sup>+</sup> |
| 666.4155                       | 2887      | 1.40     | 666.4153         | 0.34    | C <sub>43</sub> H <sub>56</sub> NO <sub>5</sub> <sup>+</sup> |
| 424.2697                       | 10171     | 4.93     | 424.2694         | 0.68    | C <sub>23</sub> H <sub>38</sub> NO <sub>6</sub> <sup>+</sup> |
| 406.2591                       | 21182     | 10.26    | 406.2588         | 0.80    | C <sub>23</sub> H <sub>36</sub> NO <sub>5</sub> <sup>+</sup> |
| 362.2693                       | 11554     | 5.60     | 362.2690         | 0.79    | C <sub>22</sub> H <sub>36</sub> NO <sub>3</sub> <sup>+</sup> |
| 336.2537                       | 3168      | 1.53     | 336.2533         | 1.11    | C <sub>20</sub> H <sub>34</sub> NO <sub>3</sub> <sup>+</sup> |
| 318.2429                       | 147628    | 71.51    | 318.2428         | 0.42    | C <sub>20</sub> H <sub>32</sub> NO <sub>2</sub> <sup>+</sup> |
| 258.1852                       | 2081      | 1.01     | 258.1852         | 0.00    | C <sub>17</sub> H <sub>24</sub> NO <sup>+</sup>              |
| 242.1904                       | 16377     | 7.93     | 242.1903         | 0.43    | C <sub>17</sub> H <sub>24</sub> N <sup>+</sup>               |
| 236.2010                       | 9959      | 4.82     | 236.2009         | 0.67    | C <sub>15</sub> H <sub>26</sub> NO <sup>+</sup>              |
| 234.1854                       | 13794     | 6.68     | 234.1852         | 0.72    | C <sub>15</sub> H <sub>24</sub> NO <sup>+</sup>              |
| 230.1905                       | 2085      | 1.01     | 230.1903         | 0.91    | C <sub>16</sub> H <sub>24</sub> N <sup>+</sup>               |
| 230.1540                       | 2970      | 1.44     | 230.1539         | 0.42    | C <sub>15</sub> H <sub>20</sub> NO <sup>+</sup>              |
| 180.1384                       | 206431    | 100.00   | 180.1383         | 0.59    | C <sub>11</sub> H <sub>18</sub> NO <sup>+</sup>              |
